# Supplementary material for: Visualizing Data Interoperability for Food Systems Sustainability Research—From Spider Webs to Neural Networks
Source: PubMed Central journal article supplement (PMC10616130; doi:10.1016/j.cdnut.2023.102006), 2023-09-29
Supplement: mmc1.pdf [file mmc1.pdf]

### Supplemental Figure 1

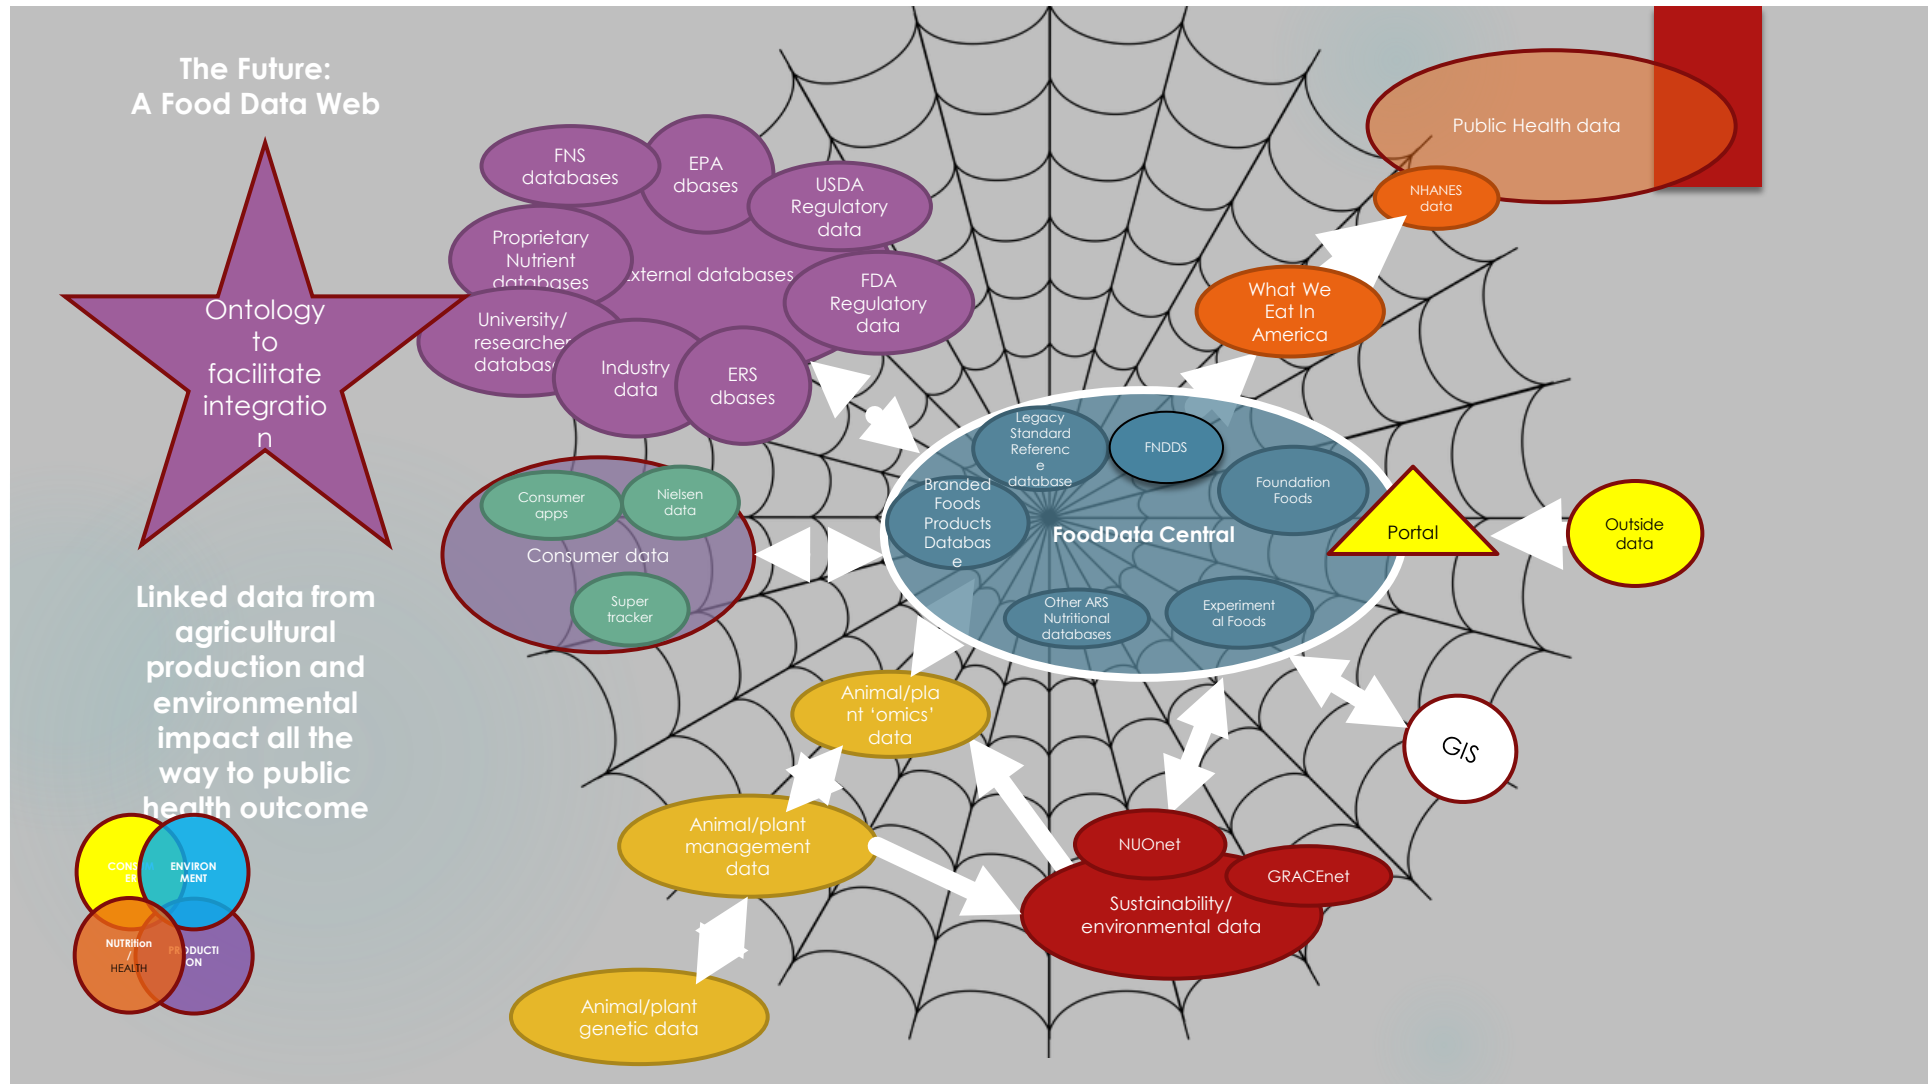

Footnote: Courtesy of John Finley USDA (16)
